# Supplementary material
Source: Research Square preprint supplement (doi:10.21203/rs.3.rs-8555628/v1)
Supplement: Supplementary file 1 [file 5342a48bb972b46254a99401.docx]

**Appendix Table A1 Descriptive characteristics of drifting elderly (N=239, 2015-2017) and local elderly (N=938, 2019)**

| Objective | Variable | Value | Drifting elderly  N (%) | Local elderly  N (%) |
| --- | --- | --- | --- | --- |
| Predisposing variables | Gender | | | |
|  | Male | 145(49.49) | 435(46.38) |
| Female | 148(50.51) | 503(53.62) |
| Age | | | |
|  | Low-age elderly | 197(67.24) | 146(15.57) |
| Middle-age elderly | 62(21.16) | 602(64.18) |
| High-age elderly | 34(11.60) | 190(20.26) |
| Education level | | | |
|  | Undergraduate college and above | 3(1.02) | 43(4.58) |
| Specialized subject in college | 6(2.05) | 241(25.69) |
| High school / Technical secondary school | 29(9.90) | 455(48.51) |
| Junior high school | 95(32.42) | 184(19.62) |
| Primary school | 138(47.10) | 15(1.6) |
| Not been to school | 22(7.51) | 0(0.00) |
| Marital status | | | |
|  | Married | 203(69.28) | 885(94.35) |
|  | Widowed & unmarried | 80(27.30) | 19(2.02) |
|  | Divorced | 10(3.42) | 34(3.63) |
| Need variables | Self-assessed health level | | | |
|  | Healthy / Basically healthy | 209 (71.33) | 248(26.44) |
| Not healthy but able to take care of themselves | 76 (25.94) | 480(51.17) |
| Cannot take care of themselves | 8 (2.73) | 210(22.39) |
| Chronic disease | | | |
|  | Yes | 249 (84.98) | 601(64.07) |
| No | 44 (15.02) | 316(33.69) |
| Enabling variables | Feel alone | | | |
|  | None | 137(46.76) | * |
| Once | 97(33.11) |
| Frequently | 14(4.78) |
| Unknown | 45(15.36) |
| Average exercise time daily | | | |
|  | 0 mins | 20(6.80） | 63(6.72) |
| >30 mins | 62(21.09) | 122(13.00) |
| 31 ~ 60 mins | 189 (64.29) | 529(56.40) |
| > 60 mins | 22(7.48) | 224(23.88) |
| Health knowledge acquisition | | | |
|  | 0 point | 0(0.00) | 0 |
| 1 ~ 4 point | 12(4.10) | 37(3.94) |
| 5 ~ 9 point | 281(95.9) | 901(96.06) |
| Insurance type | | | |
|  | New rural cooperation | 97(33.11) | 569(60.66) |
|  | Cooperation between urban and rural residents | 3(1.02) |  |
|  | Medical insurance for urban residents & workers | 156(53.24) |  |
|  | Free medical service | 4(1.37) | 147(15.67) |
|  | Uninsured | 33(11.26) | 222(23.67) |
| Pension status | | | |
|  | Labor income | 326 (14.3) | 339(36.14) |
| Savings / rent | 34 (1.5) | 37(3.94) |
| Pension | 1221 (53.6) | 468(49.89) |
| Subsistence allowance | 34 (1.50) | 0(0.00) |
| Family members | 545 (23.90) | 94(10.02) |
| Obstructive variable | Access time | =< 15 min | 201(84.10) | 421(44.88) |
| > 15 min | 38(15.90) | 517(55.12) |
